# Supplementary material
Source: Springer Nature journal article supplement (https://www.springermedizin.de/resource/supplementary/13058_2014_3424_MOESM2_ESM.pdf/9704150)

# Figure S1.

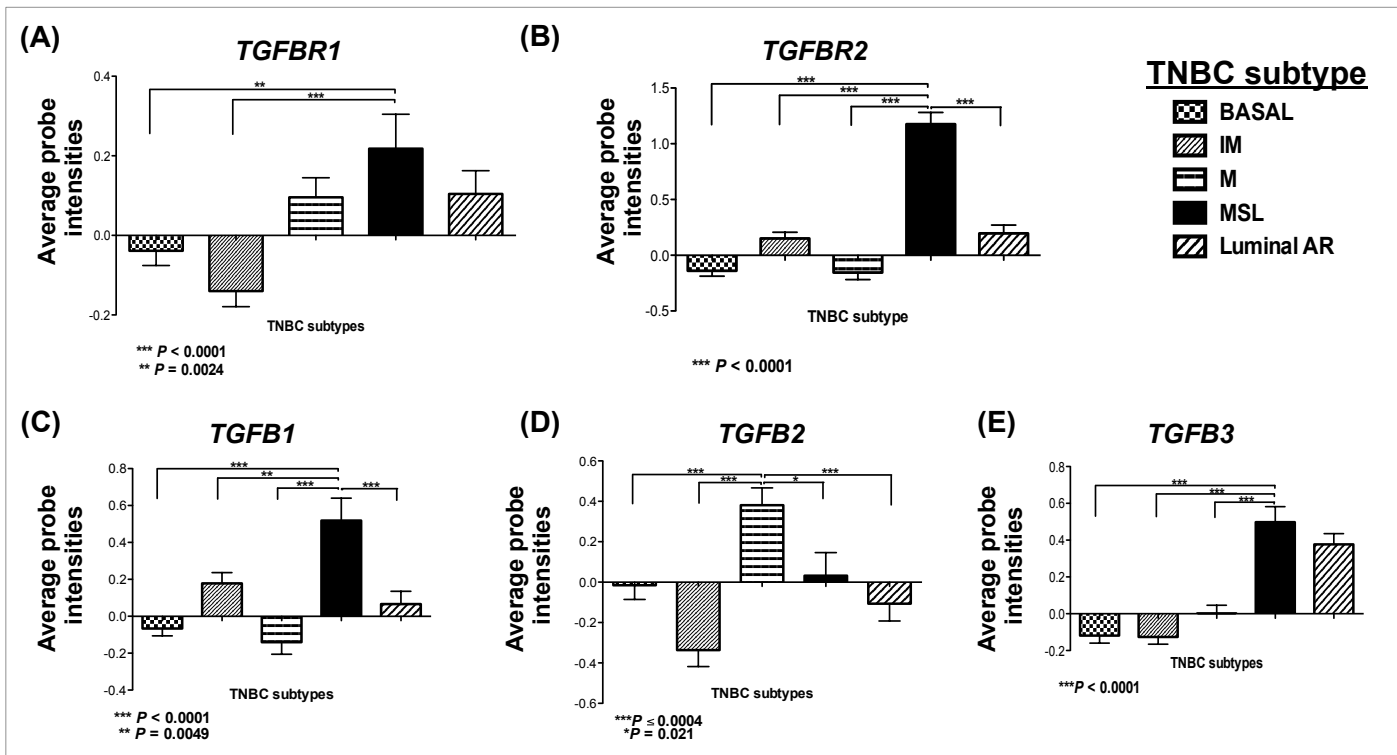

**Figure S2.**

**SUM159 xenograft tumor assay  
with two independent T $\beta$ RIII shRNA vectors**

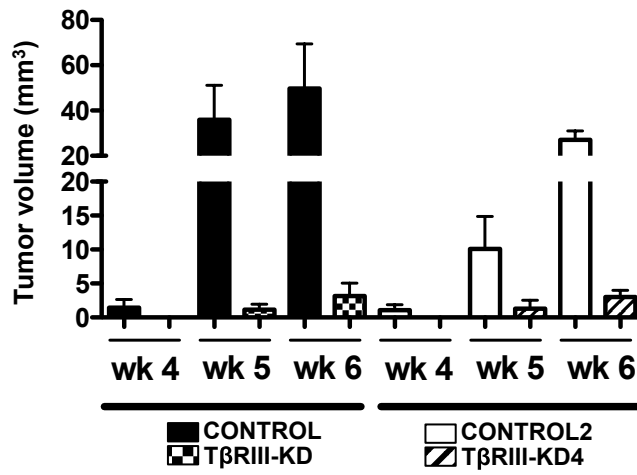

**Figure S3.**

**(A)**

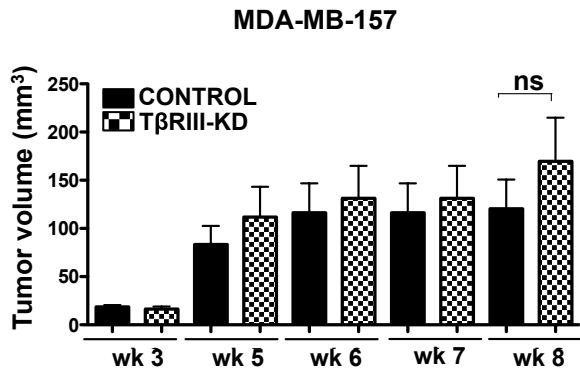

**(B)**

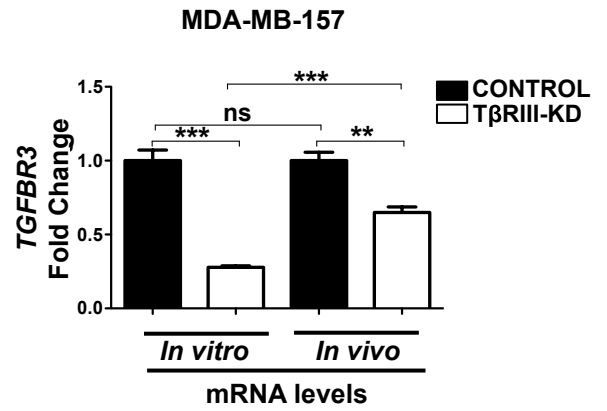

**Figure S4.**

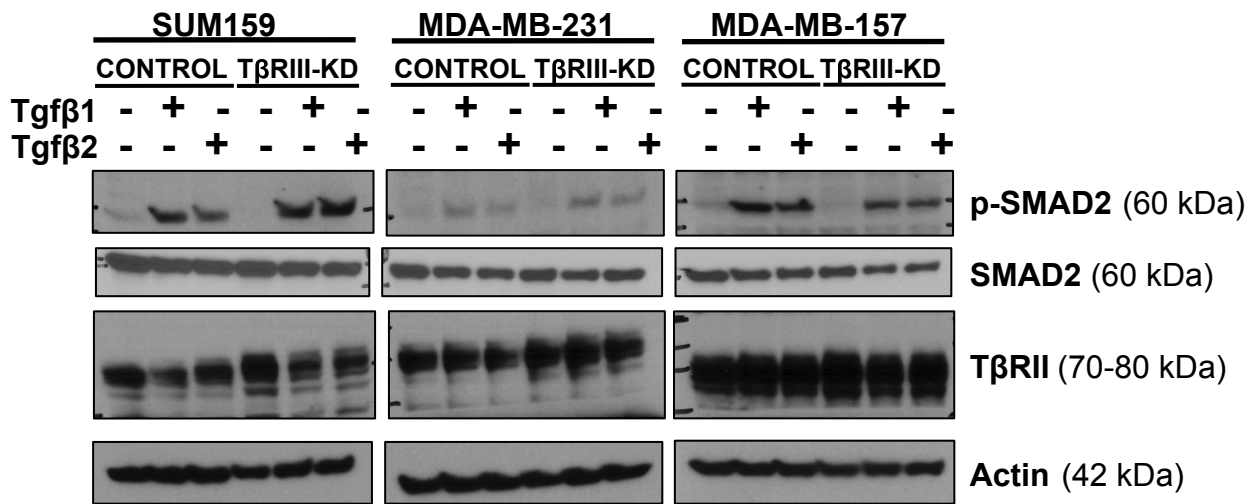

**Figure S5.**

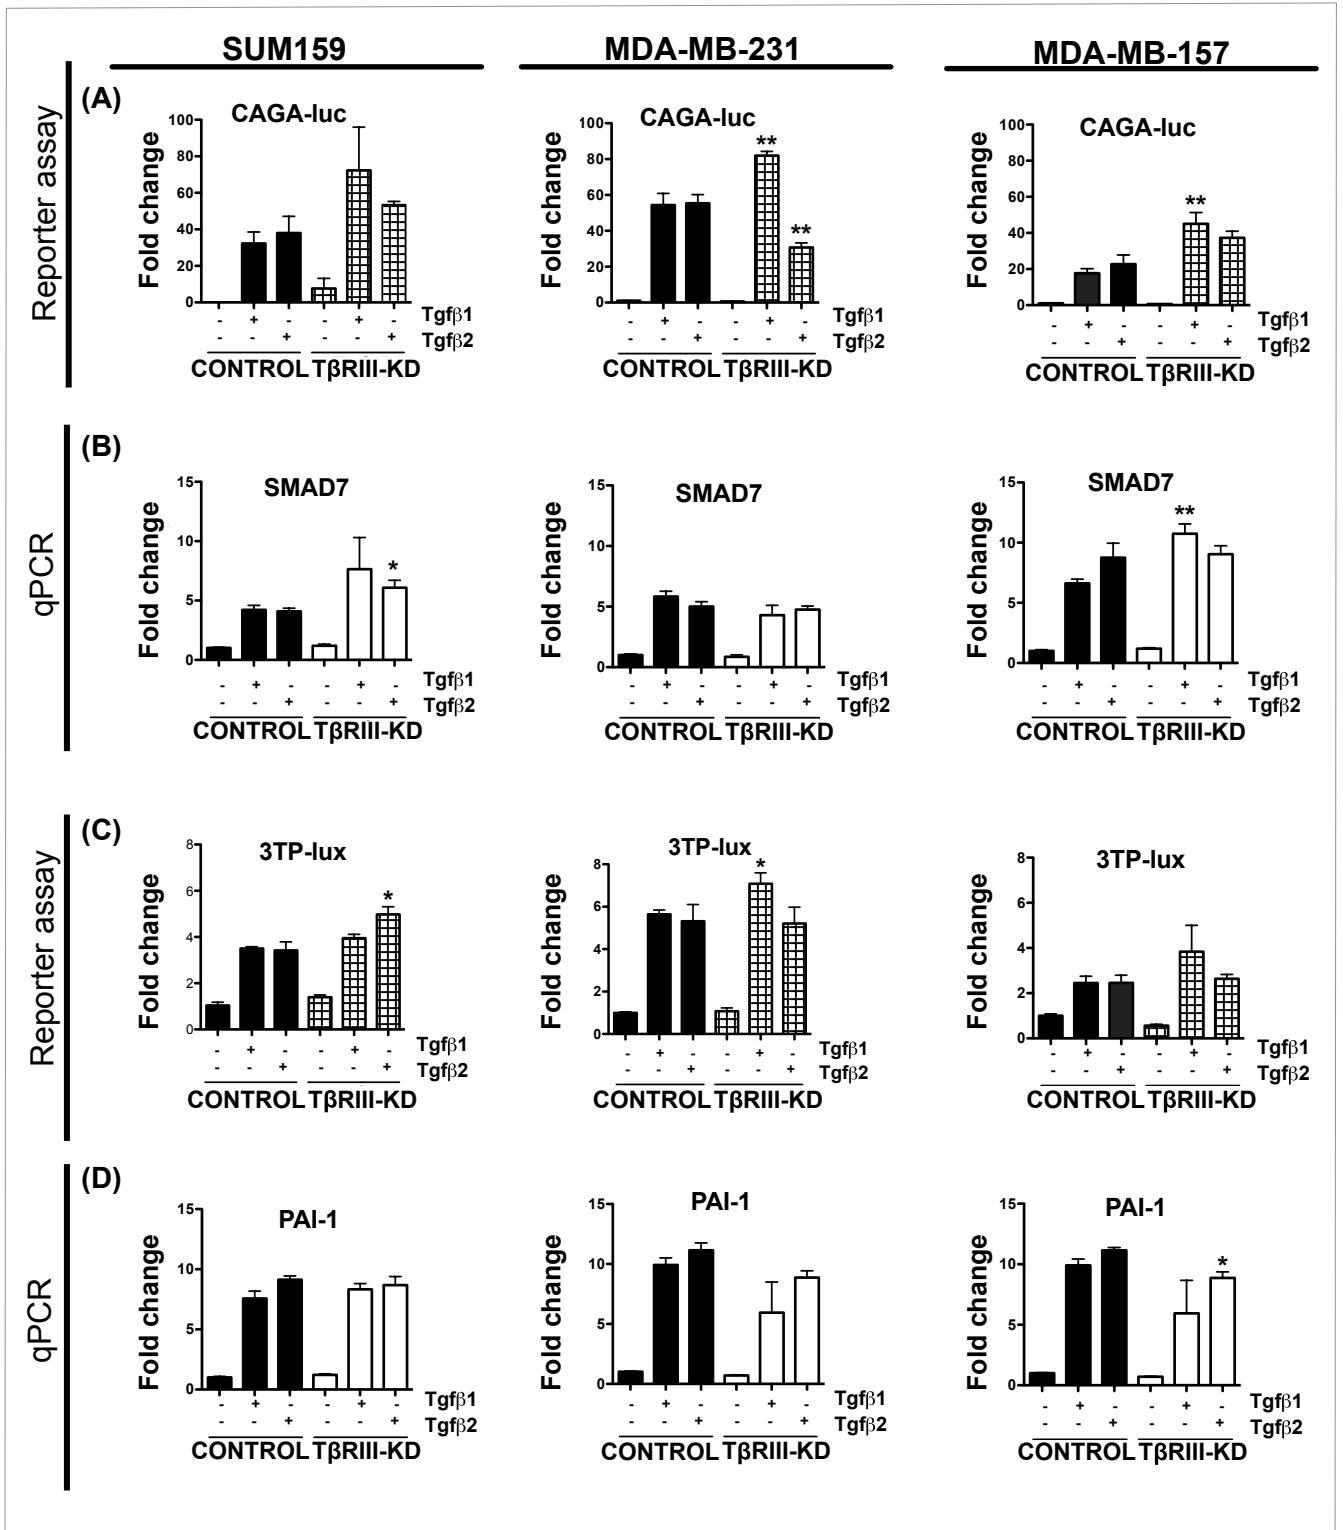

**Figure S6.**

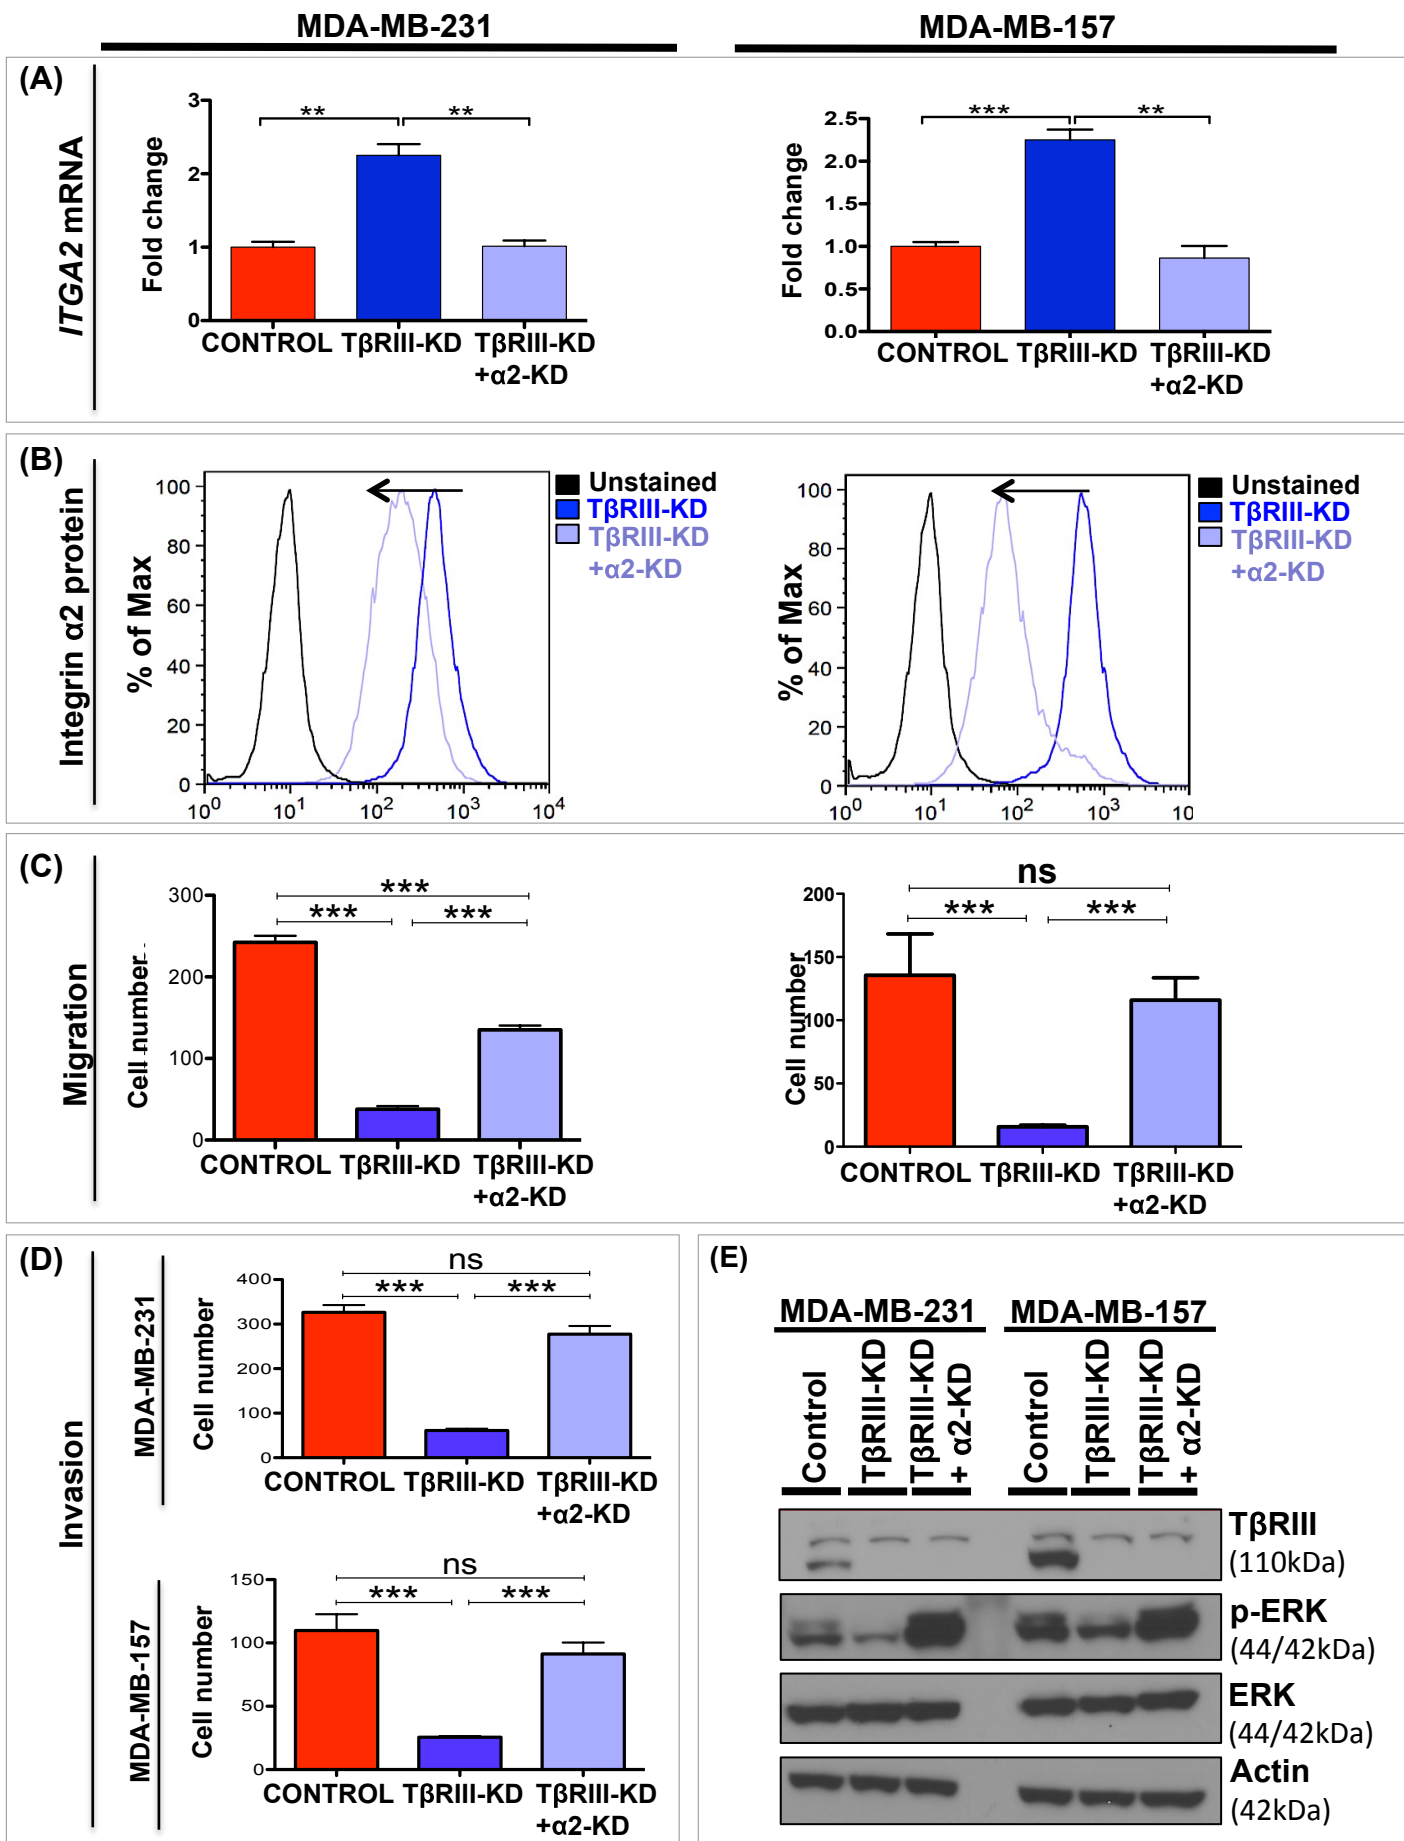

Supplement: MOESM2 [file 9704150]
